# Supplementary material for: Exposure to Secondhand Smoke Extract Increases Cisplatin Resistance in Head and Neck Cancer Cells
Source: MDPI journal article supplement (doi:10.3390/ijms25021032), 2024-01-14
Supplement: s1 [file s1]

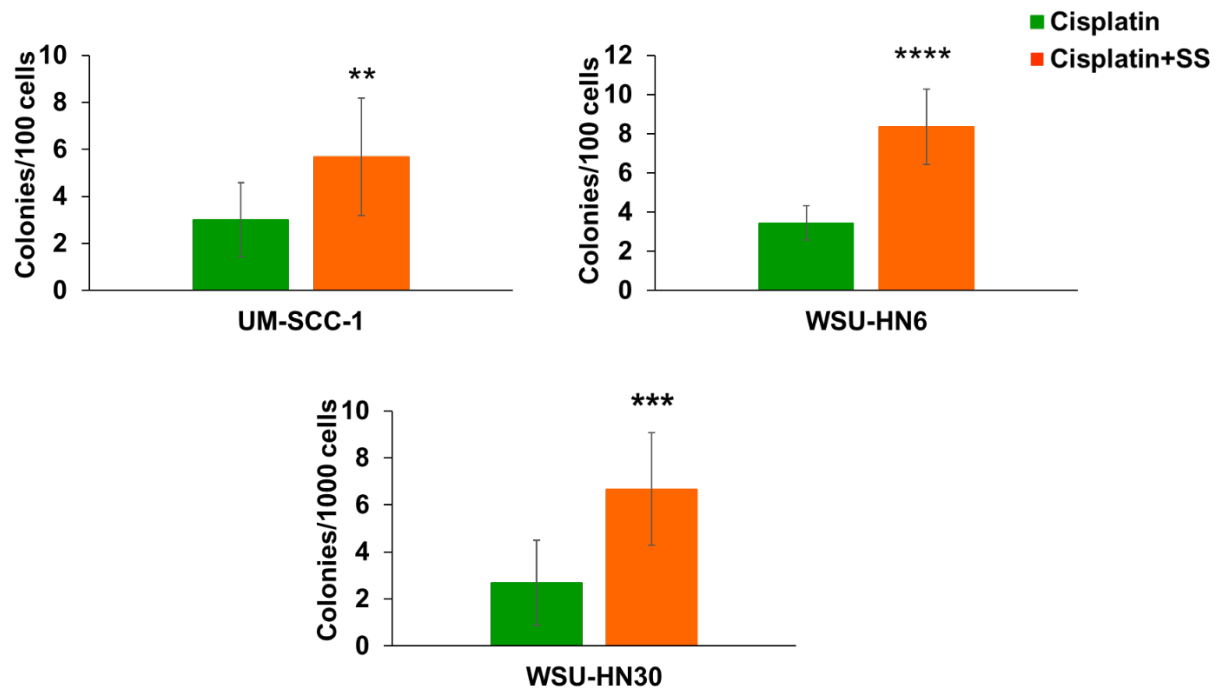

**Figure S1.** SS smoke extract exposure during cisplatin treatment for 24 hours increases cancer clonogenic survival. Indefinite reproductive viability of the cisplatin surviving cells was measured by counting the number of cell-forming colonies after 24 hours of treatment with cisplatin (2.5  $\mu$ M) in the presence or absence of SS smoke extract. Data show that the presence of SS smoke extract significantly increases colony formation in all cell lines. Data shown as mean  $\pm$  SD. \*\* $p < 0.01$ , \*\*\* $p < 0.001$ .

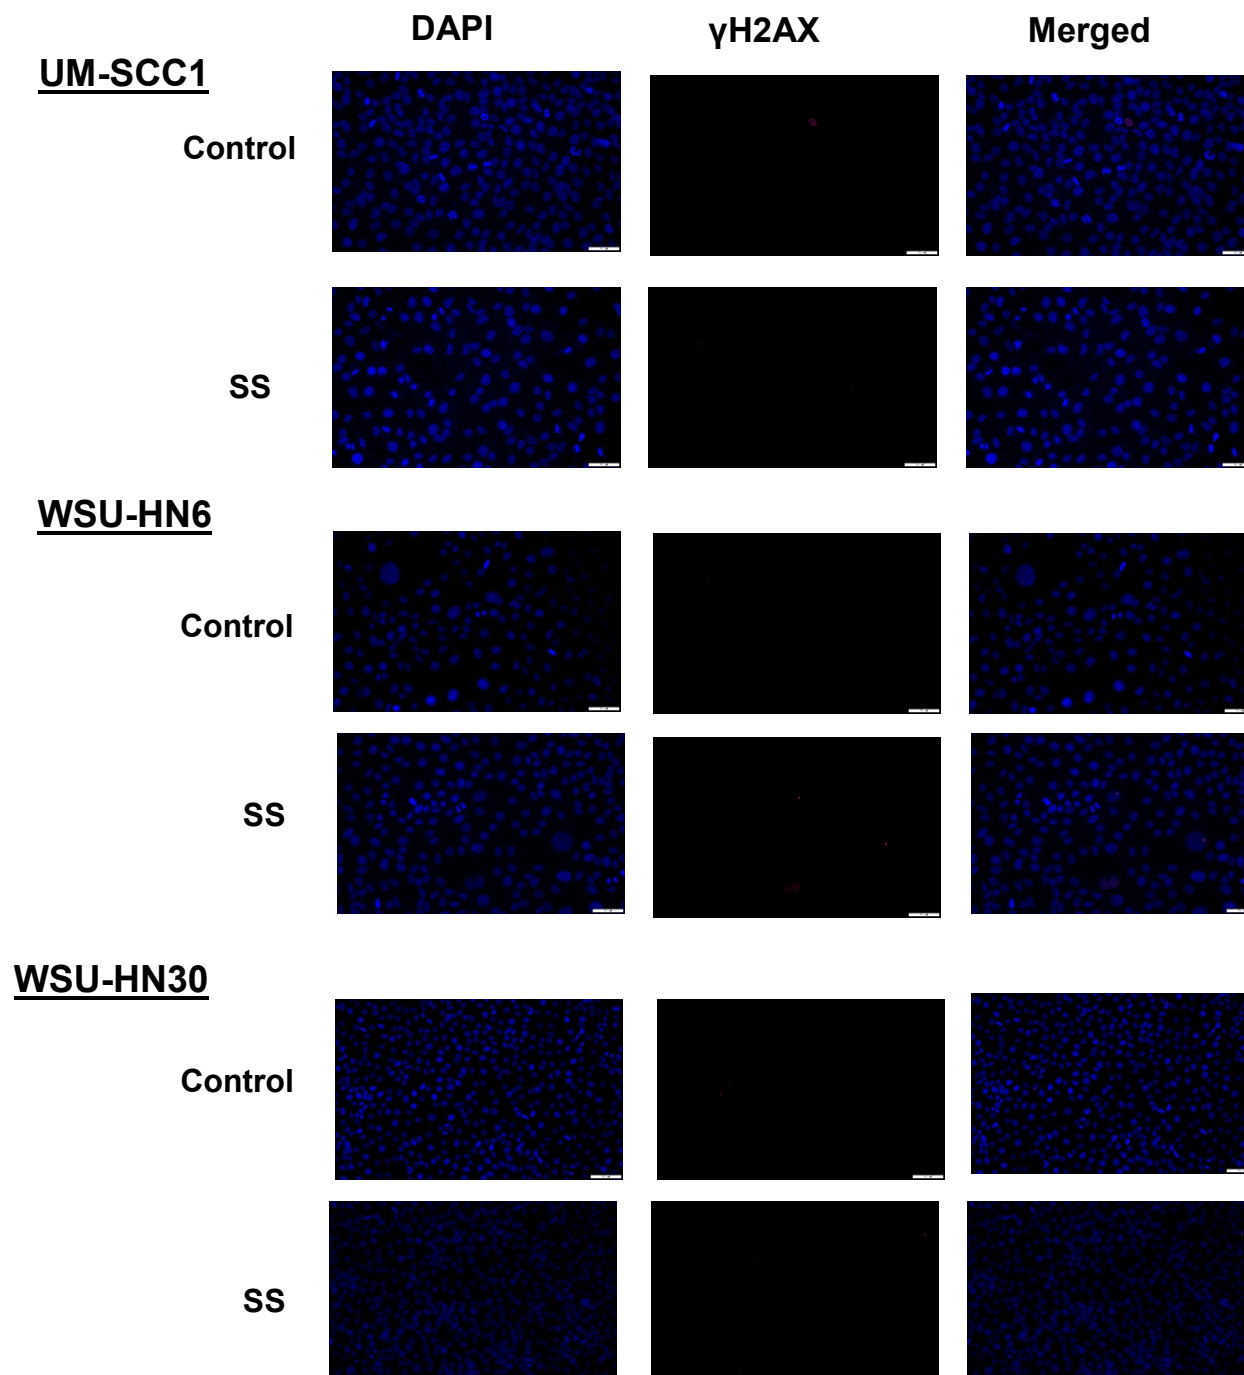

**Figure S2.** Images of  $\gamma$ H2AX staining at 96 hours for all three cell lines. UM-SCC-1, WSU-HN6, and WSU-HN30 cells were exposed to SS smoke extract for 96 h. Double-strand breaks were quantified using  $\gamma$ H2AX antibodies (bright, far-red, fluorescent dye) and DNA labelled with DAPI (blue). No difference was observed between SS-smoke-extract-only-exposed cells and unexposed control cells. The scale bar is 50 $\mu$ m.

**ABCG2 protein expression in HNSCC cells**

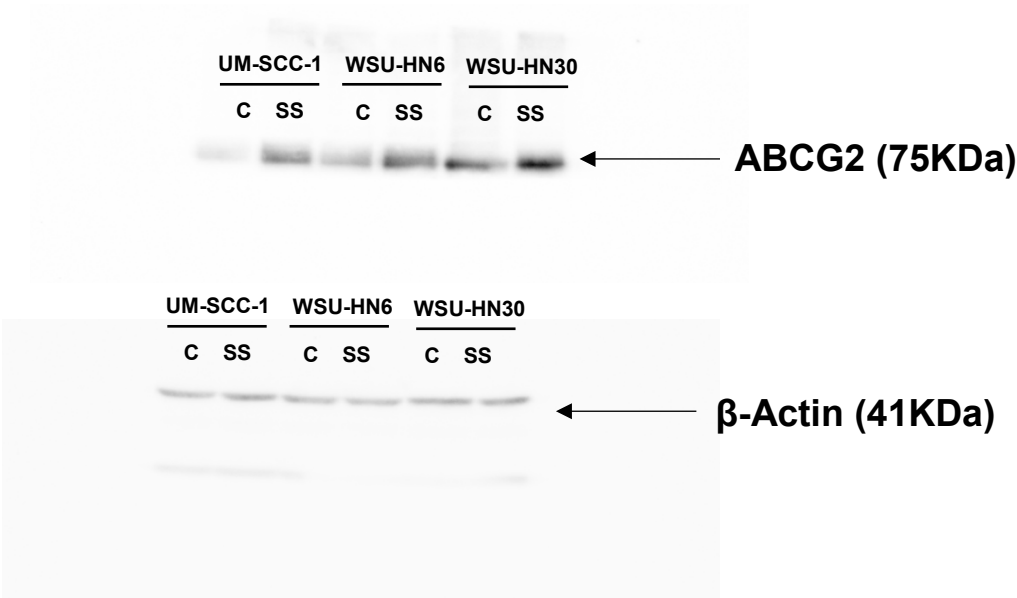

**ATP7A protein expression in HNSCC cells**

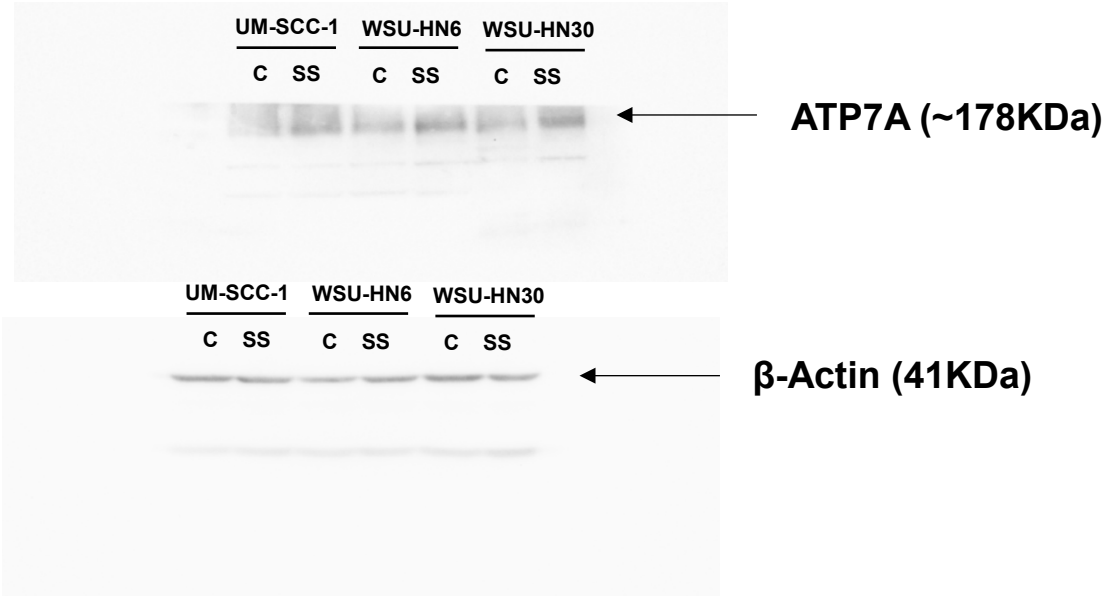

## CTR1 protein expression in HNSCC cells

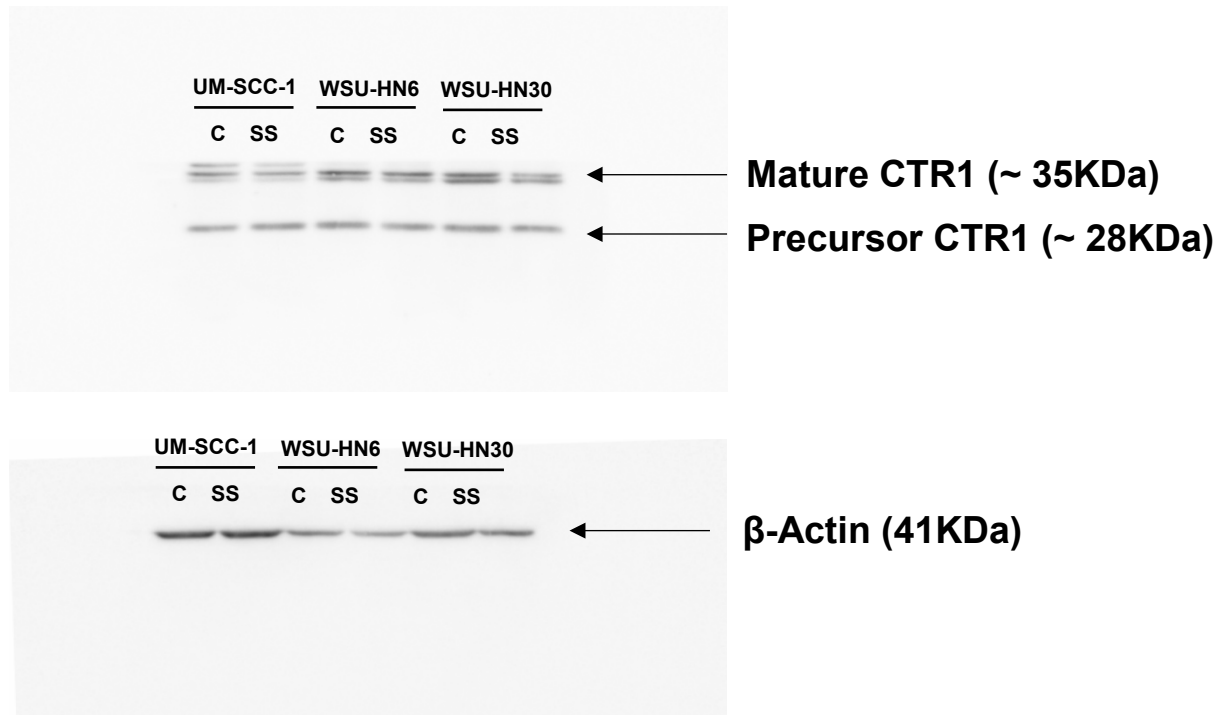

Original Western blots images for Figure 9. **Abbreviations:** SS- Side stream smoke extract; C- Control cells not-exposed to SS smoke extract.

|                                          | Manufacturer                                  | Catalog # |
|------------------------------------------|-----------------------------------------------|-----------|
| <b>Primary antibody</b>                  |                                               |           |
| anti-ABCG2                               | Cell Signaling Technology, Massachusetts, USA | 42078     |
| anti-ATP7A                               | Santa Cruz Biotechnologies, Texas, USA        | sc-376467 |
| anti-CTR1                                | Abcam, Massachusetts, USA                     | ab129067  |
| β-actin                                  | Cell Signaling Technology, Massachusetts, USA | 8457      |
| anti-Ki67                                | Cell Signaling Technology, Massachusetts, USA | 9449S     |
| anti-γH2AX                               | Sigma-Aldrich, Massachusetts, USA             | 05-636    |
| <b>Secondary antibody</b>                |                                               |           |
| rabbit anti-mouse IgG                    | Abcam, Massachusetts, USA                     | ab6728    |
| goat anti-Rabbit IgG                     | Cell Signaling Technology, Massachusetts, USA | 7074      |
| Goat anti-mouse IgG<br>(Alexa Fluor@647) | Abcam, Massachusetts, USA                     | ab150119  |

**Table S1.** Antibodies used for Western blot and Immunofluorescence analysis.

| Gene           | Forward Primer                  | Reverse Primer              |
|----------------|---------------------------------|-----------------------------|
| <i>β-actin</i> | 5'-GTCATCACCATTGGCAATGAG-3'     | 5'-ATGTCCACGTCACACTTCATG-3' |
| <i>ATP7A</i>   | 5'-GCAGAGCCTCTATAAACTCAC-3'     | 5'-GTGTCATCATCTTCCCTGAAG-3' |
| <i>CTR1</i>    | 5'-CTCATCTTCATGACCTACAACG-3'    | 5'-GATGTCAATGGCAATGCTCTG-3' |
| <i>ABCG2</i>   | 5'-TGTGGCATTAAACAGAGAAGAAGAC-3' | 5'-TCACCCCCGGAAAGTTGATG-3'  |
| <i>ERCC1</i>   | 5' -GGCGACGTAATTCCCGACT-3'      | 5' -TAGCGGAGGCTGAGGAACA-3'  |
| <i>XPA</i>     | 5'-GCAGCCCCAAAGATAATTGA-3'      | 5'-TGGCAAATCAAAGTGGTTCA-3'  |
| <i>MMS19</i>   | 5'-GTCAGCAGGACCCTGAGAGTTC-3'    | 5'-CTCAGAACTGAGGGCTCCTTC-3' |

**Table S2.** Primers used for mRNA expression analysis.
